# Supplementary material for: Real-world insight into public access defibrillator use over five years
Source: PubMed Central journal article supplement — Open Heart. 2020 Jun 7;7(1):e001251. doi: 10.1136/openhrt-2020-001251 (PMC7282393; doi:10.1136/openhrt-2020-001251), 2020-06-07
Supplement: openhrt-2020-001251supp001.pdf [file openhrt-2020-001251supp001.pdf]

**Supplemental Table 1: Showing the relationship between location, response time and percentage survival to hospital admission for those patients who received a shock. ‘Public’ included public streets, parks, hotels, restaurants and recreational facilities excluding those locations reported otherwise. Medical facilities were non-hospital treatment centres, such as general practitioner offices, dental offices or residential care facilities, where the PAD is available for use by lay-rescuers.**

| Location          | Events (n) | Mean (SD) Patient Age | Events with Known Response Times (n) | Median (IQR) Response Time (minutes) | Events with response time 5-minutes or less (N and %) | Events with Known Survival to Hospital Admission (n) | Survived to Hospital Admission n (%) |
|-------------------|------------|-----------------------|--------------------------------------|--------------------------------------|-------------------------------------------------------|------------------------------------------------------|--------------------------------------|
| Public            | 141        | 60 (13)               | 82                                   | 3 (IQR 2 to 5)                       | 56 (68.3%)                                            | 134                                                  | 76 (56.7%)                           |
| Sports Facility   | 76         | 53 (16)               | 38                                   | 2 (IQR 1 to 5)                       | 28 (73.7%)                                            | 75                                                   | 68 (90.7%)                           |
| Home              | 64         | 62 (13)               | 38                                   | 5 (IQR 4 to 6)                       | 14 (36.8%)                                            | 43                                                   | 18 (41.9%)                           |
| Office            | 30         | 55 (8)                | 16                                   | 4 (IQR 2 to 9)                       | 8 (50.0%)                                             | 28                                                   | 20 (71.4%)                           |
| Medical Facility  | 21         | 64 (13)               | 9                                    | 3 (IQR 2 to 5)                       | 5 (55.6%)                                             | 19                                                   | 11 (57.9%)                           |
| School/University | 7          | 21 (19)               | 6                                    | 5 (IQR 2 to 5)                       | 2 (33.3%)                                             | 7                                                    | 6 (85.7%)                            |
| Unknown           | 15         | 70 (12)               | 1                                    | 3 (IQR 3 to 3)                       | 1 (100.0%)                                            | 6                                                    | 4 (66.7%)                            |
| Total             | 354        | 58 (15)               | 190                                  | 4 (IQR 2 to 5)                       | 114 (60.0%)                                           | 312                                                  | 203 (65.1%)                          |
